# Supplementary material for: A unique fabrication strategy of hierarchical morphologies: combination of multi-step self-assembling and morphology transition
Source: Royal Society of Chemistry journal article supplement (doi:10.1039/c5ra05105c), 2015-01-01
Supplement: c5ra05105c1.pdf [file c5ra05105c1.pdf]

## Supporting Information

### A Unique Fabrication Strategy of Hierarchical Morphologies: Combination of Multi-Step Self-Assembling and Morphology Transition

Wenjian Zhang, Chunyan Hong\* and Caiyuan Pan\*

CAS Key Laboratory of Soft Matter Chemistry, Department of Polymer Science and  
Engineering, University of Science and Technology of China, Hefei, 230026, Anhui,  
P.R. China.

Email: hongcy@ustc.edu.cn, pcy@ustc.edu.cn

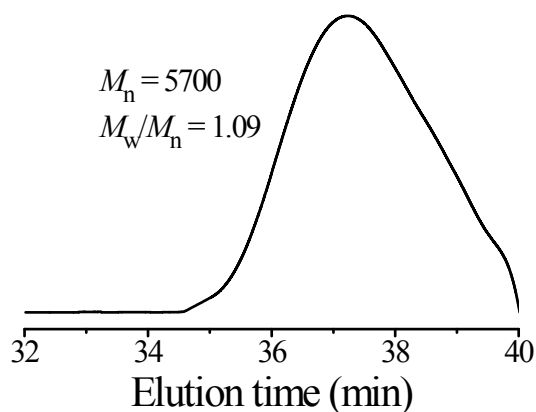

**Figure S1.** GPC trace of P4VP-TC in DMF.

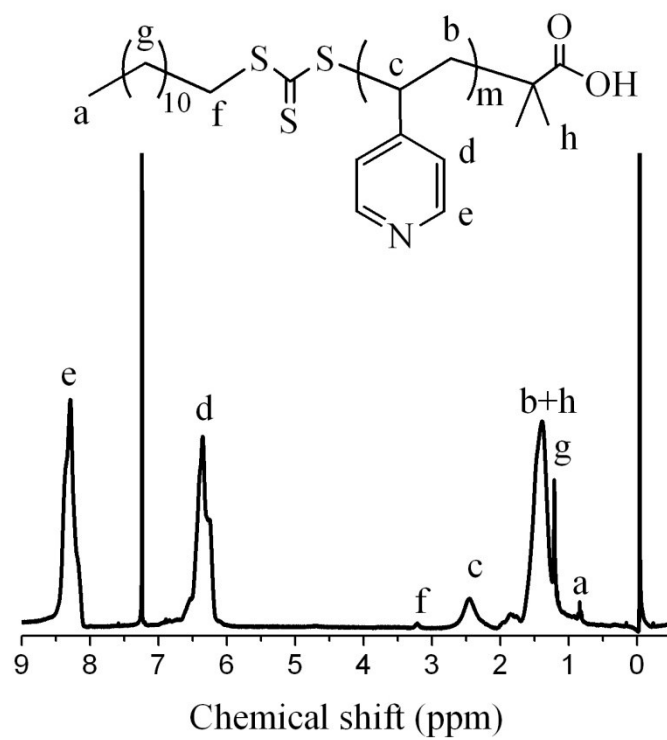

**Figure S2.** <sup>1</sup>H NMR spectrum of P4VP-TC in CDCl<sub>3</sub>.

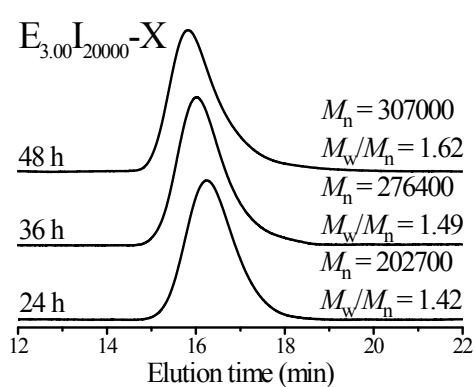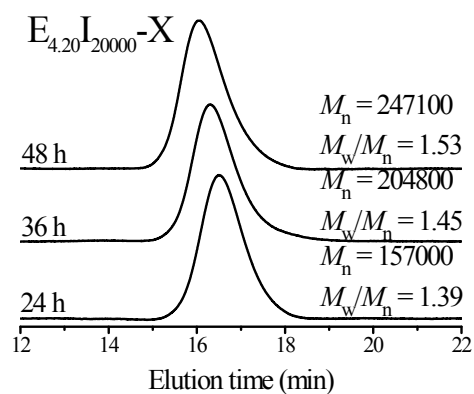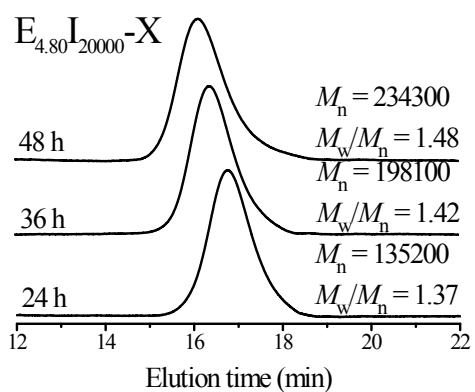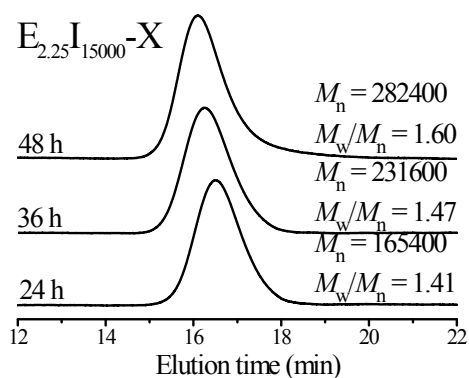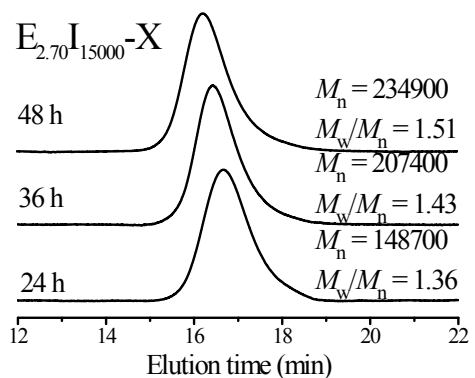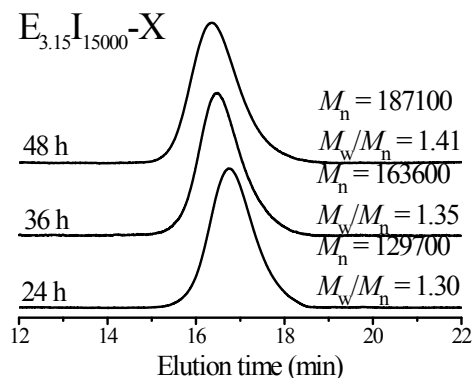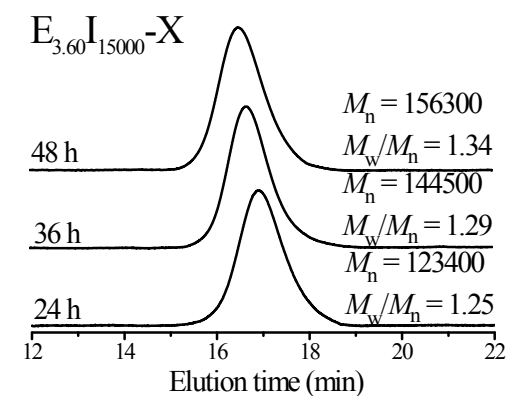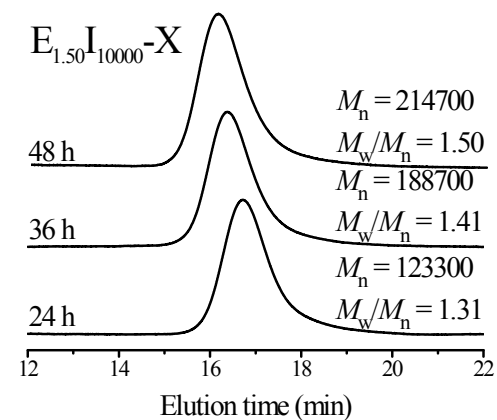

(Continues on next page)

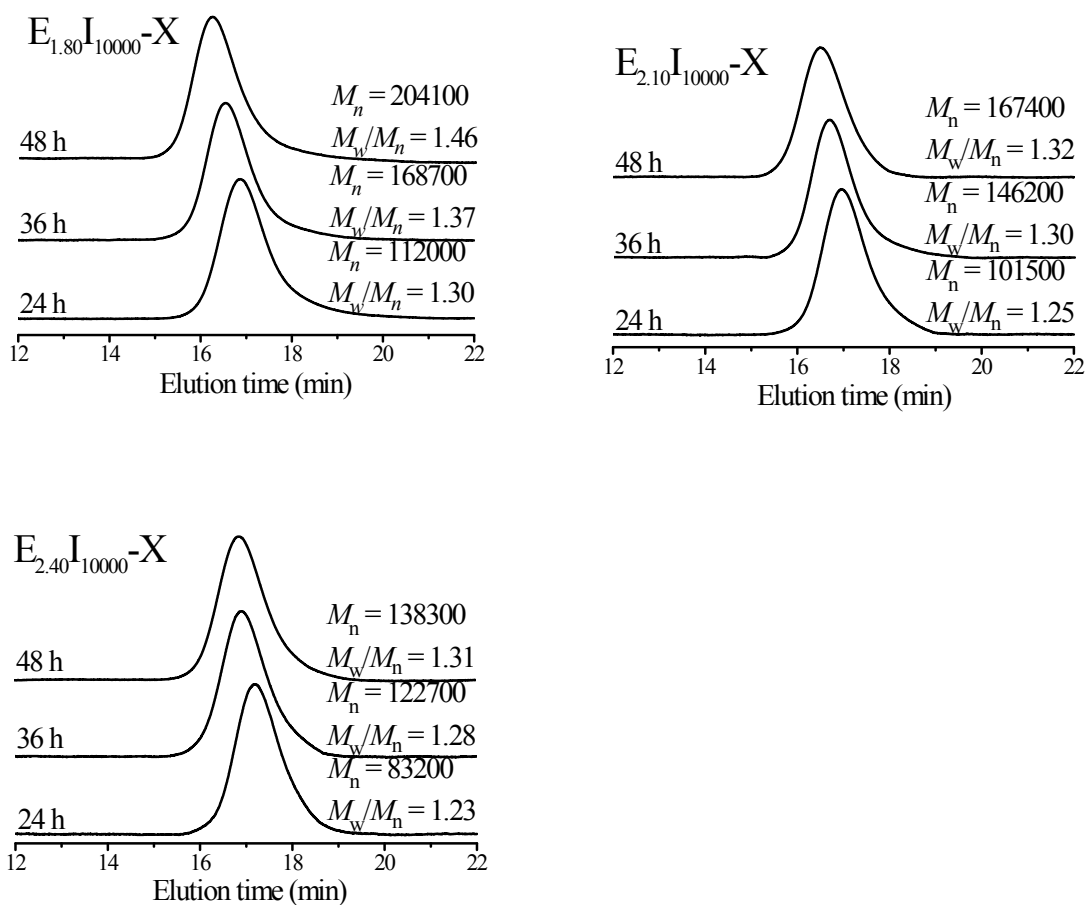

**Figure S3.** GPC traces of the P4VP<sub>39</sub>-PS<sub>m</sub> block copolymers obtained from RAFT dispersion polymerization with various molar ratios of St/P4VP-TC/AIBN at 80°C for different polymerization times. E<sub>a</sub>I<sub>b</sub>-X: X denotes polymerization time (h); I<sub>20000</sub>, I<sub>15000</sub> and I<sub>10000</sub> respectively refer to initial feed molar ratios of St/P4VP/AIBN = 20000/1/0.1, 15000/1/0.1 and 10000/1/0.1; E<sub>a</sub> refers to weight (g) of the ethanol mixed with 5.2 g of St for I<sub>20000</sub>, 3.9 g of St for I<sub>15000</sub>, and 2.6 g of St for I<sub>10000</sub>.

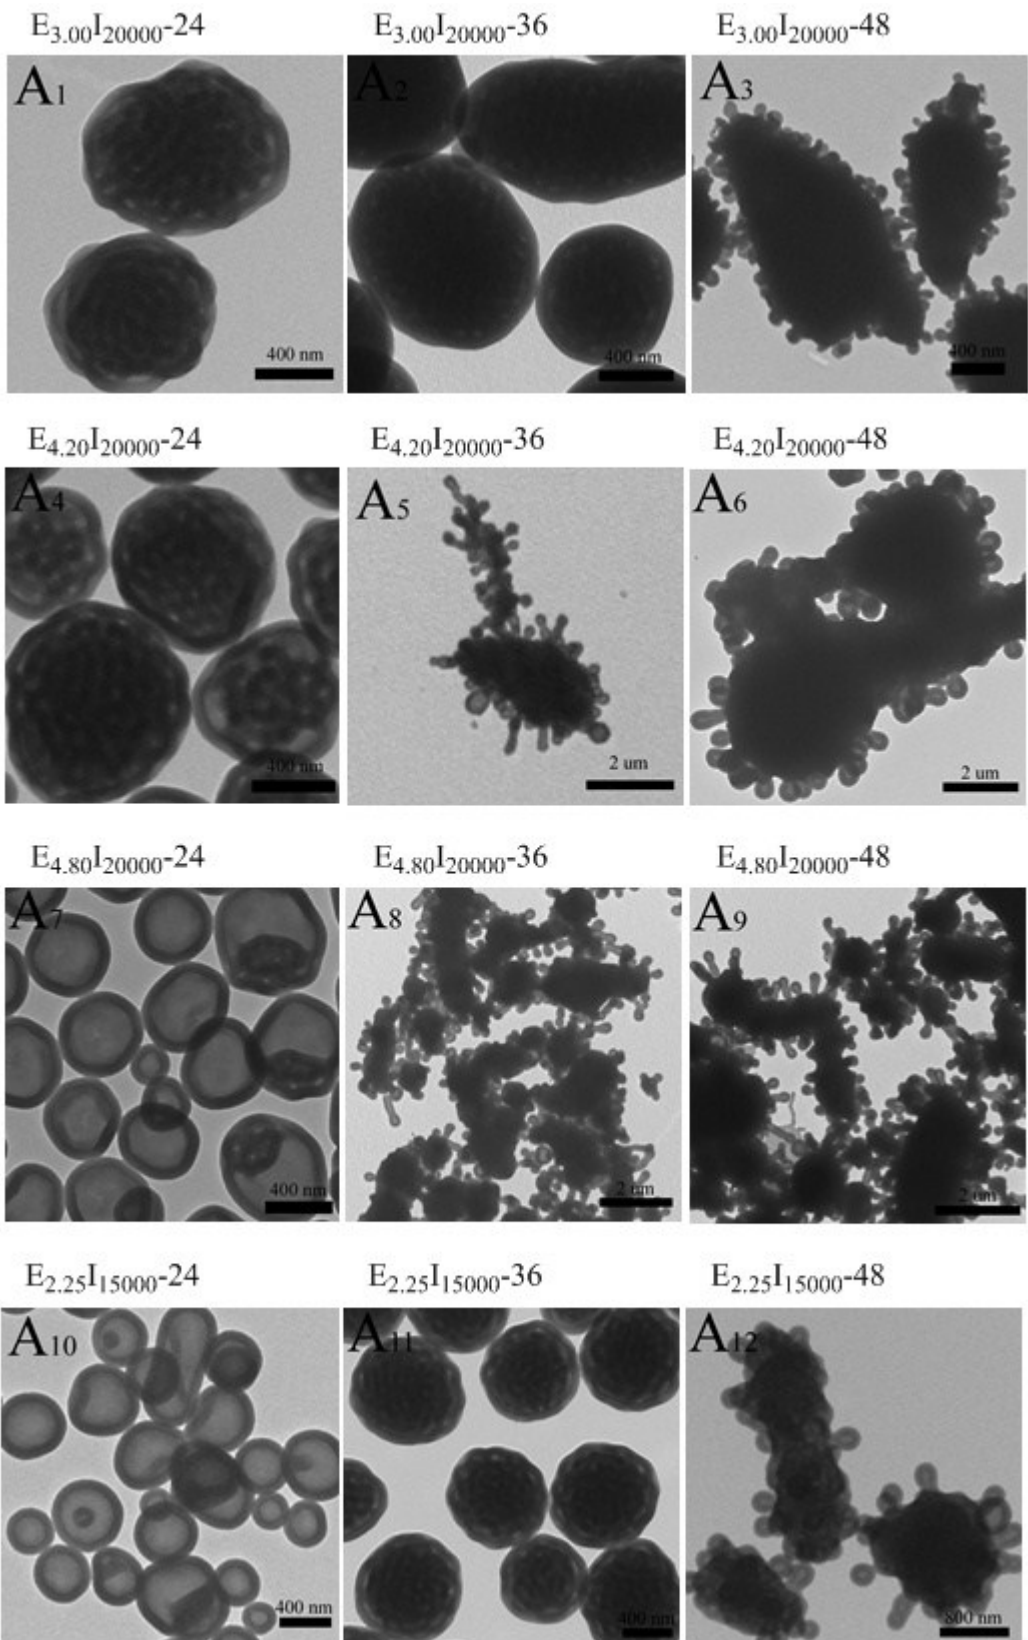

(Continues on next page)

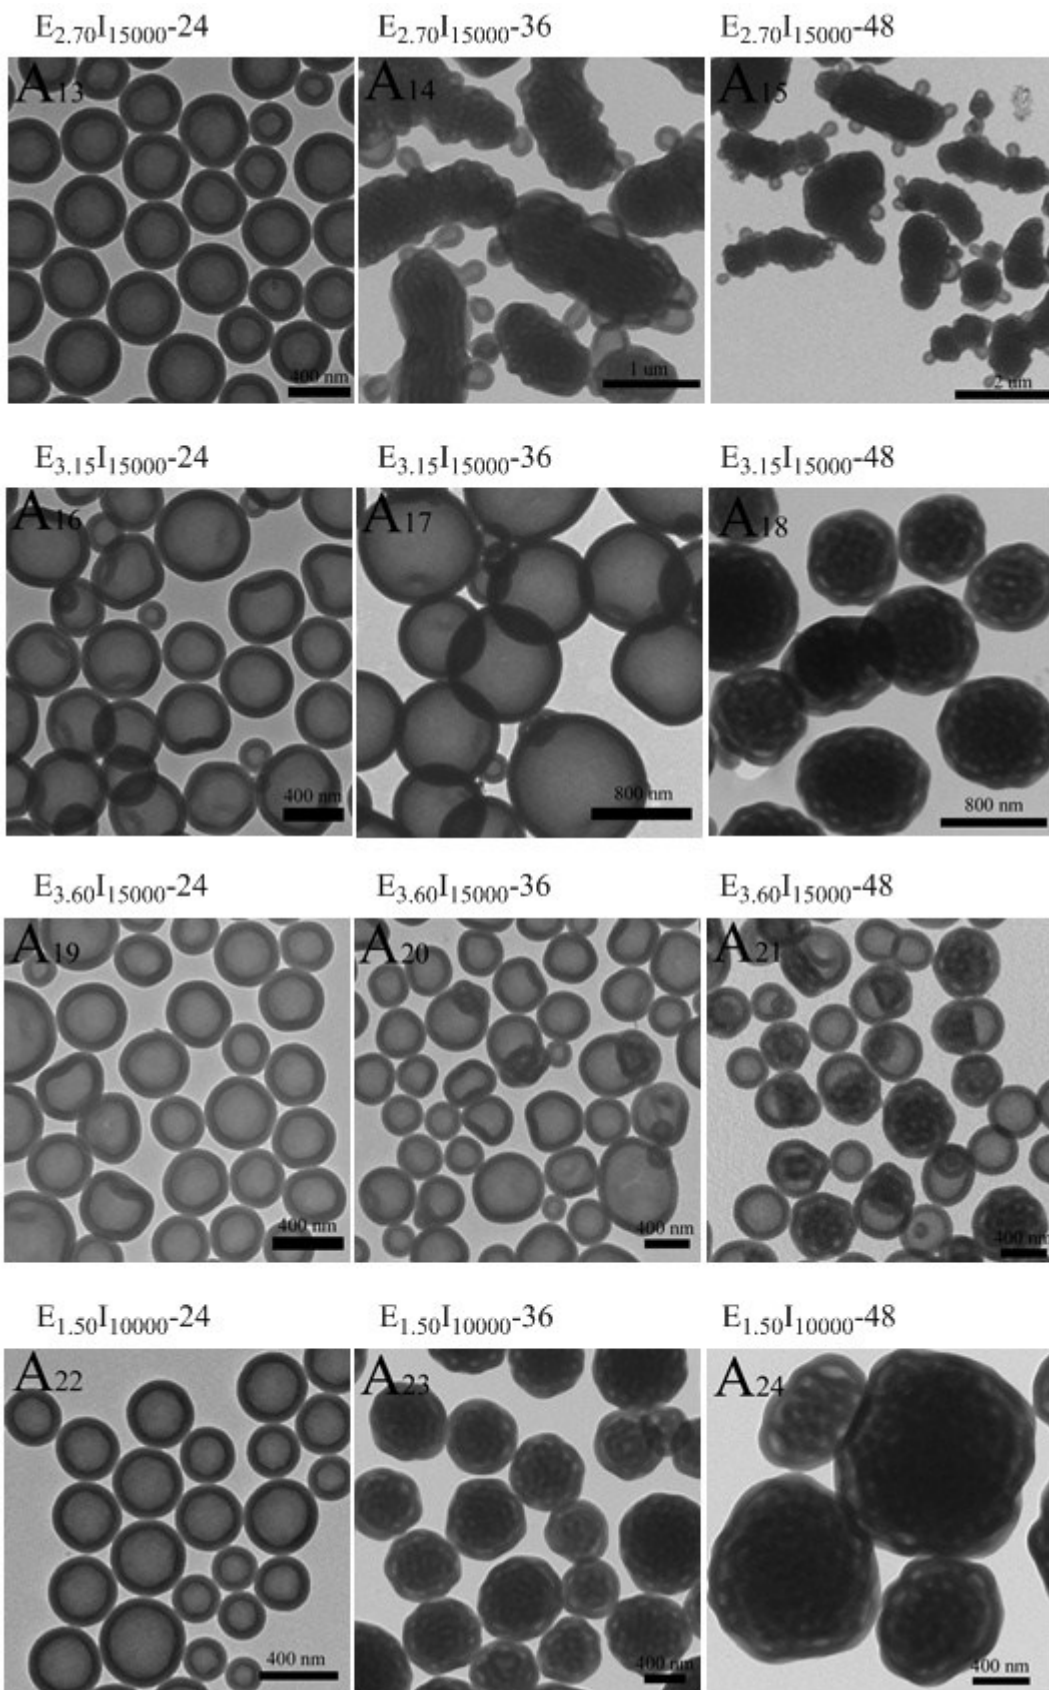

(Continues on next page)

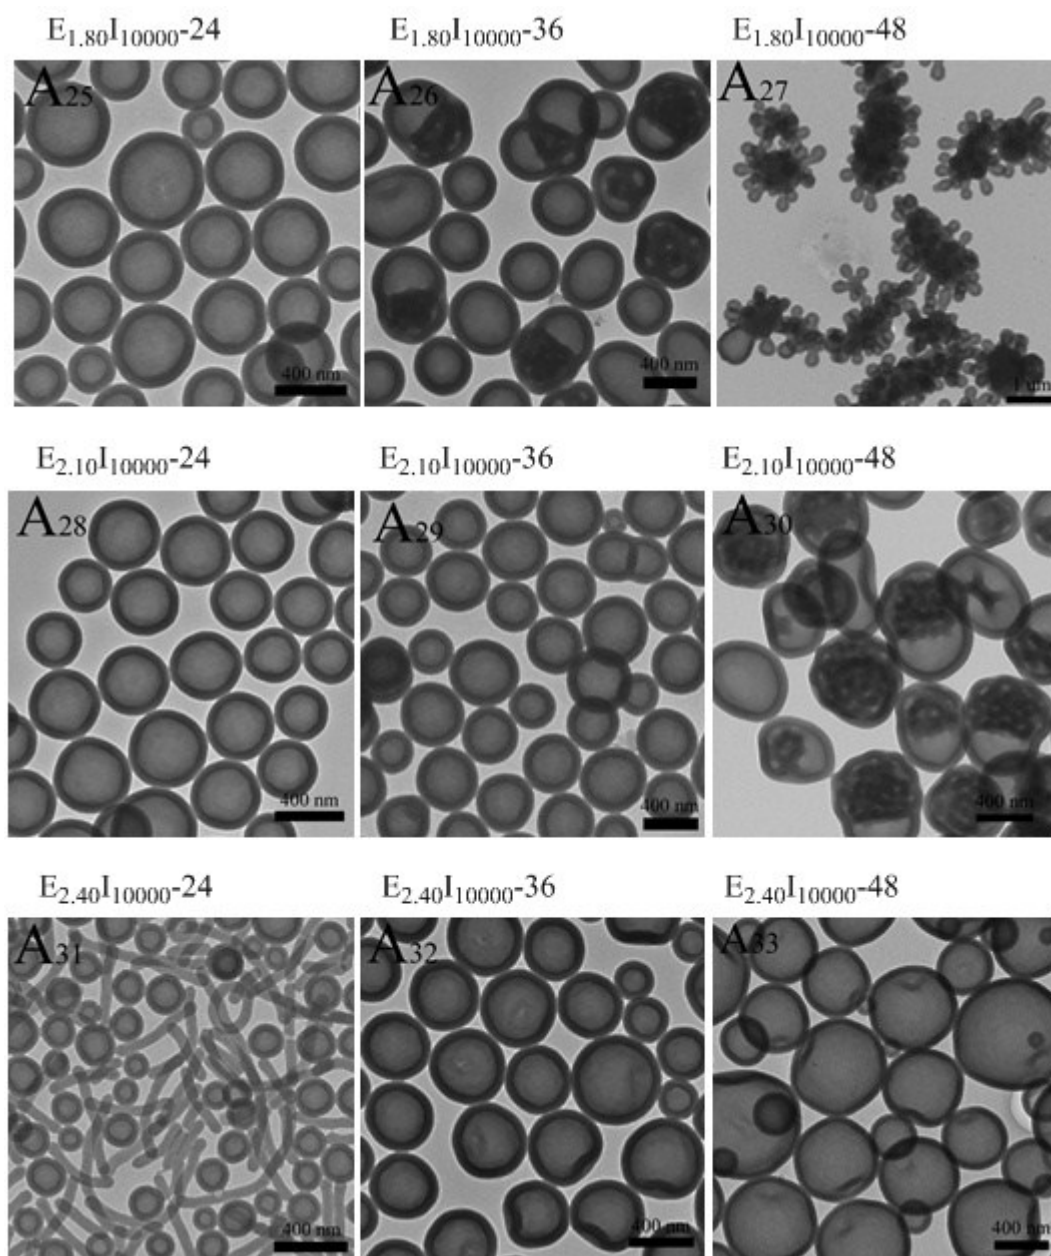

**Figure S4.** TEM images of the resultant aggregates obtained from RAFT dispersion polymerization in ethanol at 80°C for different polymerization times.  $E_aI_b-X$ , X denotes polymerization time (h);  $I_{20000}$ ,  $I_{15000}$  and  $I_{10000}$  refer to initial feed molar ratio of St/P4VP/AIBN = 20000/1/0.1, 15000/1/0.1 and 10000/1/0.1, respectively;  $E_a$  refers to weights (g) of the ethanol mixed with 5.2 g of St for  $I_{20000}$ , 3.9 g of St for  $I_{15000}$ , and 2.6 g of St for  $I_{10000}$ .

**Table S1.** Characterizations of P4VP<sub>39</sub>-PS<sub>x</sub> Diblock Copolymers and Morphologies Prepared by RAFT Dispersion Polymerization in ethanol at 80°C

| Sample code <sup>a</sup>                 | N <sub>PS</sub> <sup>b</sup> | R <sup>b</sup> | M <sub>n</sub> <sup>c</sup> (g/mol) | M <sub>w</sub> /M <sub>n</sub> <sup>c</sup> | Morphology <sup>d</sup> |
|------------------------------------------|------------------------------|----------------|-------------------------------------|---------------------------------------------|-------------------------|
| E <sub>3.00</sub> I <sub>20000</sub> -24 | 2434                         | 62.4           | 202700                              | 1.42                                        | lcV                     |
| E <sub>3.00</sub> I <sub>20000</sub> -36 | 3226                         | 82.7           | 276400                              | 1.49                                        | lcV                     |
| E <sub>3.00</sub> I <sub>20000</sub> -48 | 3637                         | 93.3           | 307000                              | 1.62                                        | SHM                     |
| E <sub>3.60</sub> I <sub>20000</sub> -12 | 970                          | 24.9           | 99300                               | 1.36                                        | v                       |
| E <sub>3.60</sub> I <sub>20000</sub> -24 | 2220                         | 56.9           | 189000                              | 1.40                                        | v + lcV                 |
| E <sub>3.60</sub> I <sub>20000</sub> -30 | 2790                         | 71.5           | 231100                              | 1.46                                        | lcV                     |
| E <sub>3.60</sub> I <sub>20000</sub> -36 | 3021                         | 77.5           | 261900                              | 1.52                                        | SHM                     |
| E <sub>3.60</sub> I <sub>20000</sub> -48 | 3420                         | 87.7           | 289100                              | 1.59                                        | SHM                     |
| E <sub>4.20</sub> I <sub>20000</sub> -24 | 1864                         | 47.8           | 157000                              | 1.39                                        | lcV                     |
| E <sub>4.20</sub> I <sub>20000</sub> -36 | 2488                         | 63.8           | 204800                              | 1.45                                        | SHM                     |
| E <sub>4.20</sub> I <sub>20000</sub> -48 | 2907                         | 74.5           | 247100                              | 1.53                                        | SHM                     |
| E <sub>4.80</sub> I <sub>20000</sub> -24 | 1539                         | 39.5           | 135200                              | 1.37                                        | v                       |
| E <sub>4.80</sub> I <sub>20000</sub> -36 | 2285                         | 58.6           | 198100                              | 1.42                                        | SHM                     |
| E <sub>4.80</sub> I <sub>20000</sub> -48 | 2850                         | 73.1           | 234300                              | 1.48                                        | SHM                     |
| E <sub>2.25</sub> I <sub>15000</sub> -24 | 1904                         | 48.8           | 165400                              | 1.41                                        | v                       |
| E <sub>2.25</sub> I <sub>15000</sub> -36 | 2411                         | 61.8           | 231600                              | 1.47                                        | lcV                     |
| E <sub>2.25</sub> I <sub>15000</sub> -48 | 2742                         | 70.3           | 282400                              | 1.60                                        | SHM                     |
| E <sub>2.70</sub> I <sub>15000</sub> -24 | 1653                         | 42.4           | 148700                              | 1.36                                        | v                       |
| E <sub>2.70</sub> I <sub>15000</sub> -36 | 2143                         | 54.9           | 207400                              | 1.43                                        | SHM                     |
| E <sub>2.70</sub> I <sub>15000</sub> -48 | 2536                         | 65.0           | 234900                              | 1.51                                        | SHM                     |
| E <sub>3.15</sub> I <sub>15000</sub> -24 | 1476                         | 37.8           | 129700                              | 1.30                                        | v                       |
| E <sub>3.15</sub> I <sub>15000</sub> -36 | 1910                         | 49.0           | 163600                              | 1.35                                        | v                       |
| E <sub>3.15</sub> I <sub>15000</sub> -48 | 2086                         | 53.5           | 187100                              | 1.41                                        | lcV                     |
| E <sub>3.60</sub> I <sub>15000</sub> -24 | 1352                         | 34.7           | 123400                              | 1.25                                        | v                       |
| E <sub>3.60</sub> I <sub>15000</sub> -36 | 1677                         | 43.0           | 144500                              | 1.29                                        | v                       |
| E <sub>3.60</sub> I <sub>15000</sub> -48 | 1813                         | 46.5           | 156300                              | 1.34                                        | v + lcV                 |
| E <sub>1.50</sub> I <sub>10000</sub> -24 | 1524                         | 39.1           | 123300                              | 1.31                                        | v                       |
| E <sub>1.50</sub> I <sub>10000</sub> -36 | 2207                         | 56.6           | 188700                              | 1.41                                        | lcV                     |
| E <sub>1.50</sub> I <sub>10000</sub> -48 | 2394                         | 61.4           | 214700                              | 1.50                                        | lcV                     |
| E <sub>1.80</sub> I <sub>10000</sub> -24 | 1368                         | 35.1           | 112000                              | 1.30                                        | v                       |
| E <sub>1.80</sub> I <sub>10000</sub> -36 | 1881                         | 48.2           | 168700                              | 1.37                                        | v + lcV                 |
| E <sub>1.80</sub> I <sub>10000</sub> -48 | 2105                         | 54.0           | 204100                              | 1.46                                        | SHM                     |
| E <sub>2.10</sub> I <sub>10000</sub> -24 | 1251                         | 32.1           | 101500                              | 1.25                                        | v                       |
| E <sub>2.10</sub> I <sub>10000</sub> -36 | 1660                         | 42.6           | 146200                              | 1.30                                        | v                       |
| E <sub>2.10</sub> I <sub>10000</sub> -48 | 1858                         | 47.6           | 167400                              | 1.32                                        | v + lcV                 |
| E <sub>2.40</sub> I <sub>10000</sub> -24 | 1047                         | 26.8           | 83200                               | 1.23                                        | v + nr                  |
| E <sub>2.40</sub> I <sub>10000</sub> -36 | 1334                         | 34.2           | 122700                              | 1.28                                        | v                       |
| E <sub>2.40</sub> I <sub>10000</sub> -48 | 1452                         | 37.2           | 138300                              | 1.31                                        | v                       |

<sup>a</sup>Note: E<sub>a</sub>I<sub>b</sub>-X, where E stands for ethanol, “a” denotes initial weight (g) of ethanol mixed with 5.2 g of St for I<sub>20000</sub>, 3.9 g of St for I<sub>15000</sub>, and 2.6 g of St for I<sub>10000</sub>; I<sub>b</sub> is the initial molar ratio of the St/P4VP-TC, X is polymerization time (h). <sup>b</sup> N<sub>PS</sub> is DP of PS and R is chain length ratio of the PS block to P4VP block, which were calculated according to <sup>1</sup>H NMR data. <sup>c</sup>Number-average molecular weights (M<sub>n</sub>) and M<sub>w</sub>/M<sub>n</sub> of P4VP-PS<sub>m</sub> obtained by GPC. <sup>d</sup>The copolymer morphology is identified by TEM, where nr = nanorods, v = vesicles, lcV = large compound vesicles, SHM = sea cucumber-like hierarchical microstructures.
